# Supplementary material for: LDH-assisted growth of FeCo bimetal-MOF nanorods for electrocatalytic oxygen evolution
Source: Royal Society of Chemistry journal article supplement (doi:10.1039/d2ra04871j), 2022-01-01
Supplement: d2ra04871j1.pdf [file d2ra04871j1.pdf]

## Supplementary Materials

# LDH-assisted Growth of FeCo Bimetal-MOF Nanorods for Electrocatalytic Oxygen Evolution

Lin Tang<sup>a</sup>, Minjuan Cai<sup>a</sup>, Maosheng Zhang<sup>a</sup>, Xi Chen<sup>b</sup>, Zhixiong Cai<sup>a\*</sup>

<sup>a</sup> College of Chemistry, Chemical Engineering and Environment, Minnan Normal University, Zhangzhou 363000, China

<sup>b</sup> College of Chemistry and Chemical Engineering, Xiamen University, Xiamen 361005, China

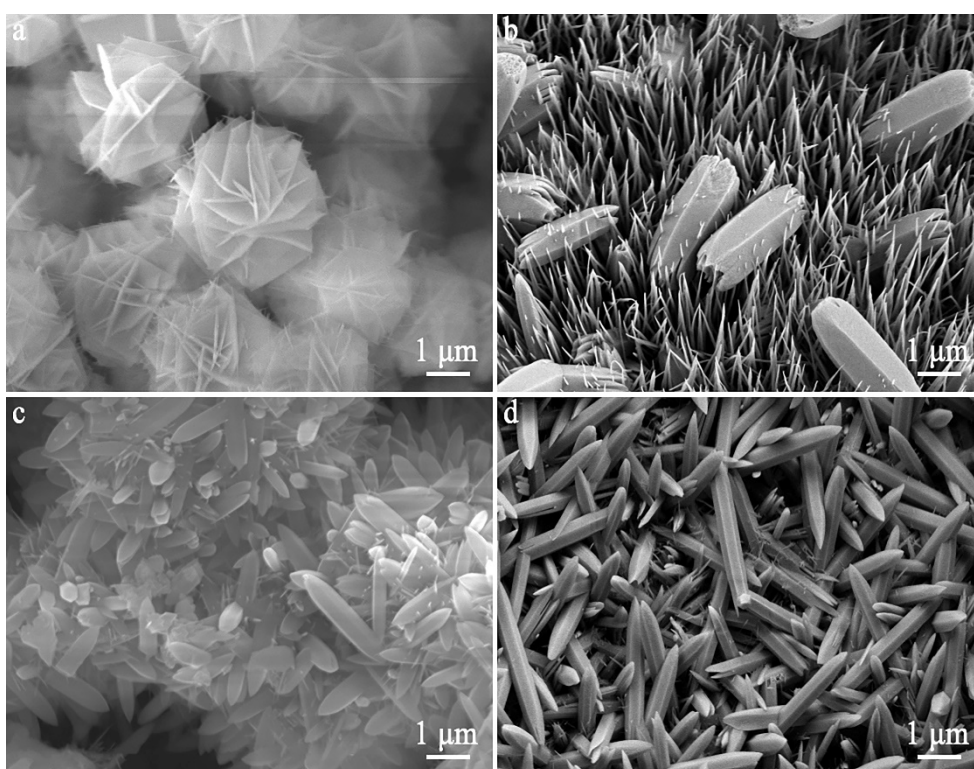

**Fig. S1** SEM images of (a) FeCo-LDH, (b) TMOF2-48, (c) TMOF4-48 and (d) TMOF6-48.

---

\* Corresponding author.  
E-mail addresses: [czx1816@mnnu.edu.cn](mailto:czx1816@mnnu.edu.cn) (Z. Cai).

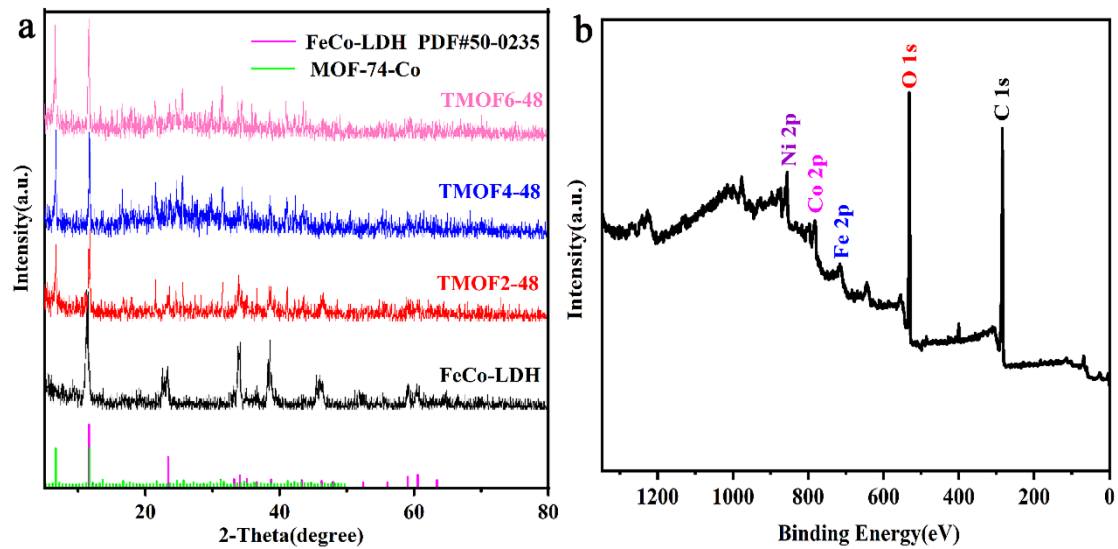

**Fig. S2** (a) XRD patterns of FeCo-LDH, TMOF2-48, TMOF4-48 and TMOF6-48. (b) XPS survey spectra of the obtained TMOF4-48.

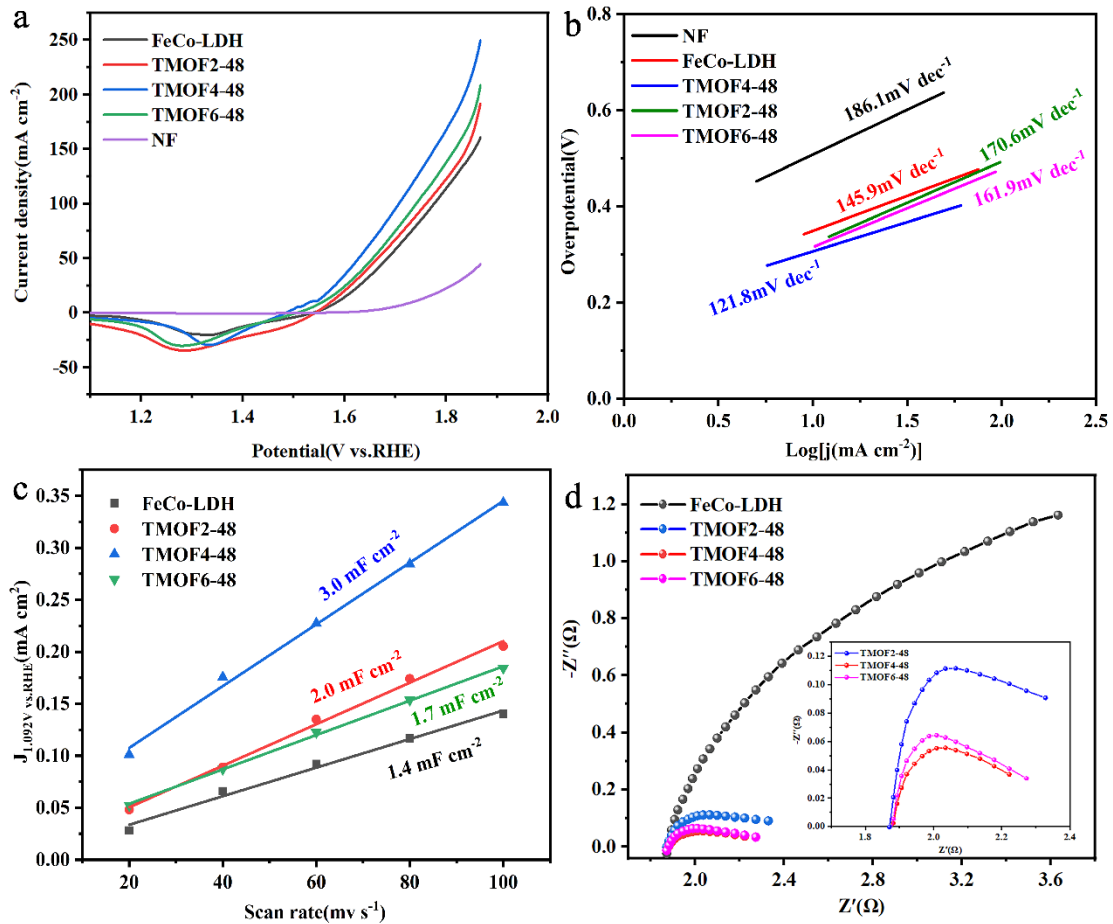

**Fig. S3** (a) Polarization curves and (b) The corresponding Tafel plots of OER on the FeCo-LDH, TMOF2-48, TMOF4-48, TMOF6-48 and NF. (c)  $C_{dl}$  values of FeCo-LDH, TMOF2-48, TMOF4-48 and TMOF6-48. (d) EIS spectra of prepared catalysts in 1.0 M KOH.

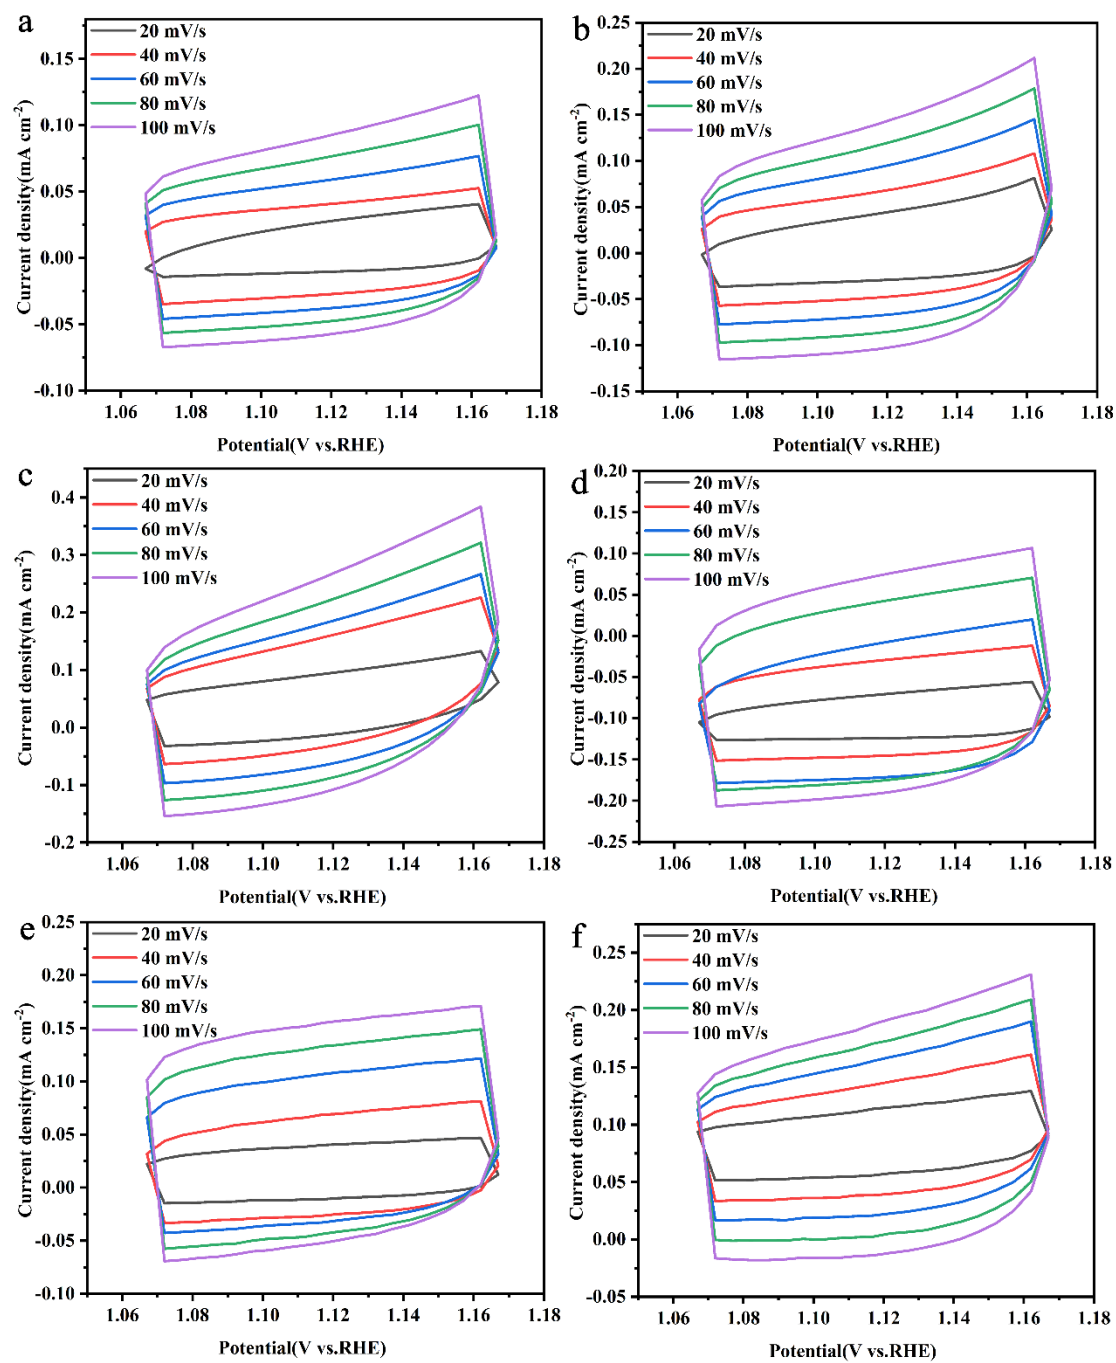

**Fig. S4** Cyclic voltammograms of (a) FeCo-LDH, (b) TMOF4-24, (c) TMOF4-48, (d) TMOF4-72, (e) TMOF2-48 and (f) TMOF6-48 in 1.0 M KOH solutions at various scan rates within a potential range of 1.07-1.17 V.
